# Supplementary material for: Dihydrotanshinone I Inhibits the Proliferation and Growth of Oxaliplatin-Resistant Human HCT116 Colorectal Cancer Cells
Source: MDPI journal article supplement (doi:10.3390/molecules27227774), 2022-11-11

## **Supplementary material**

### **Dihydrotanshinone I inhibits the proliferation and growth of Oxaliplatin-resistant human HCT116 colorectal cancer cells**

Mengge Wang<sup>1</sup>, Yusen Xiang<sup>1</sup>, Ruyu Wang<sup>1</sup>, Lijun Zhang<sup>1</sup>, Hong Zhang<sup>1</sup>, Hongzhuan Chen<sup>1</sup>, Xin Luan<sup>1,\*</sup>, Lili Chen<sup>1,\*</sup>

<sup>1</sup>Shanghai Frontiers Science Center of TCM Chemical Biology, Institute of Interdisciplinary Integrative Medicine Research, Shanghai University of Traditional Chinese Medicine, Shanghai, 201203, China

\*Correspondence:

Xin Luan, Ph D

Shanghai University of Traditional Chinese Medicine, Shanghai 201203, China

Tel./fax: +86 21 51322428

E-mail: [luanxin@shutcm.edu.cn](mailto:luanxin@shutcm.edu.cn)

Lili Chen, Ph D

Shanghai Frontiers Science Center for Chinese Medicine Chemical Biology, Institute of Interdisciplinary Integrative Medicine Research, Shanghai University of Traditional Chinese Medicine, Shanghai, 201203, China

Tel./fax: +86 21 51322720

E-mail: [llchen@shutcm.edu.cn](mailto:llchen@shutcm.edu.cn)

**Table S1** Fifteen compounds obtained from LBVS.

| Number | Name                | Compound structure |
|--------|---------------------|--------------------|
| 1      | Dihydrotanshinone I |                    |
| 2      | Chrysin             |                    |
| 3      | Doxycycline hyclate |                    |
| 4      | Sodium erythorbate  |                    |
| 5      | Luteolin            |                    |
| 6      | Xanthine            |                    |
| 7      | Taxifolin           |                    |

8 Prednisone acetate

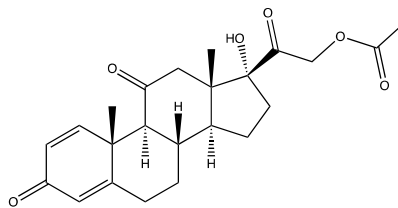

9 Ftaxilide

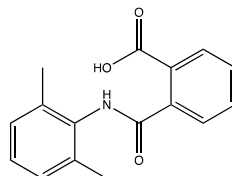

10 7,4'-  
dihydroxyflavone

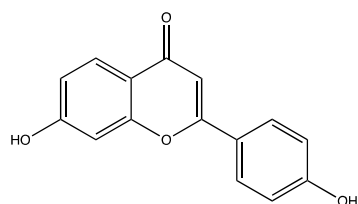

11 Allantoin

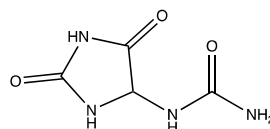

12 L-Dihydroorotic acid

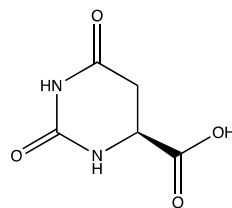

13 Dehydrocholic acid

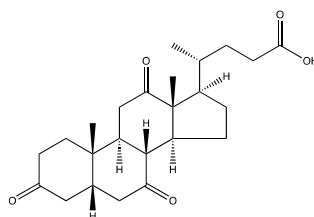

14 Deoxycorticosterone  
acetate

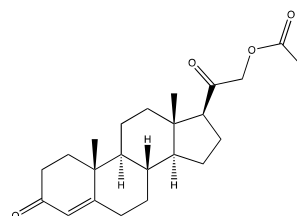

15 Theobromine

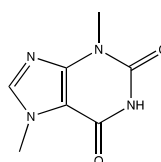

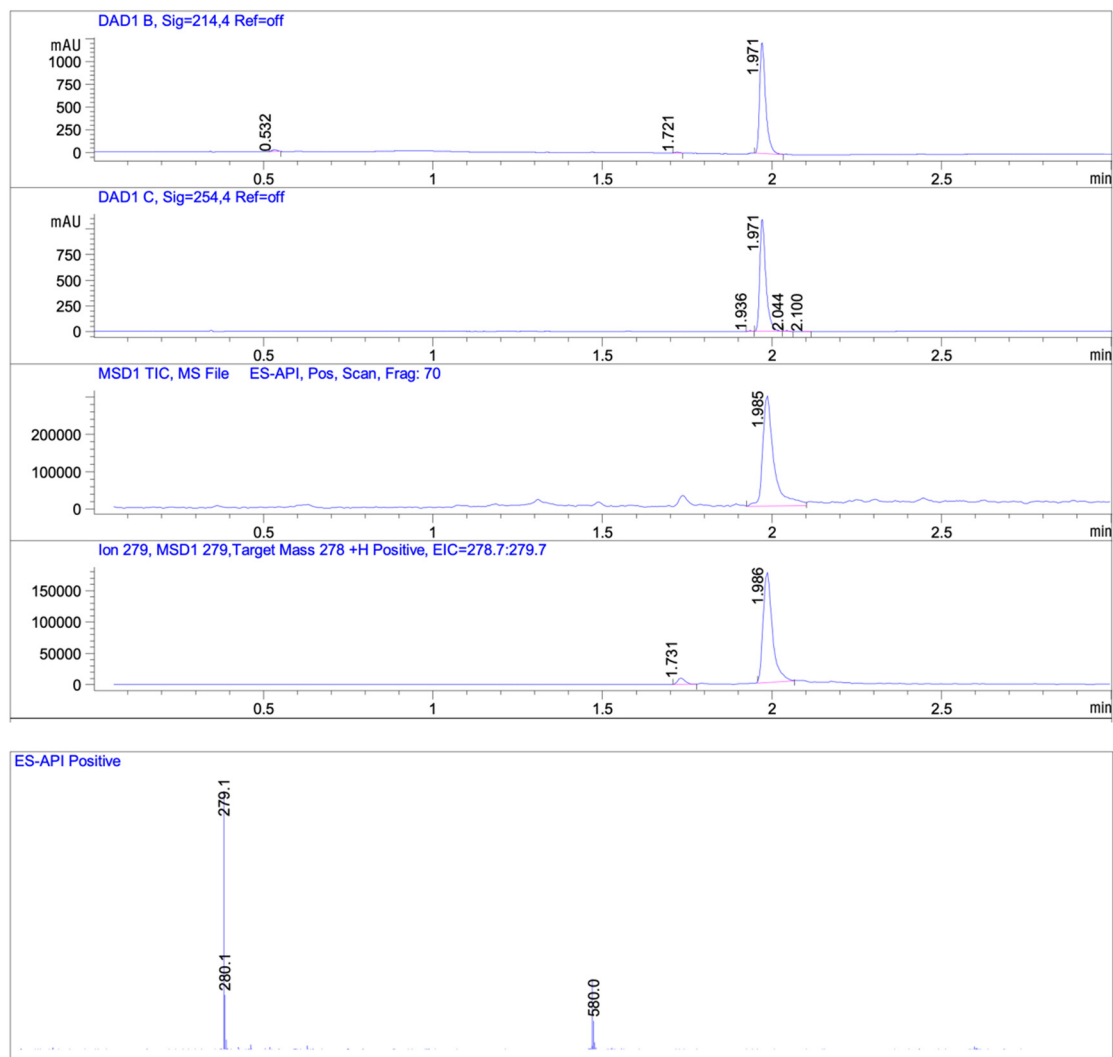

**Figure S1** LC-MS of Dihydrotanshinone I

**Table S2** Eight compounds from *Salvia miltiorrhiza*.

| Number | Name             | Compound structure                                                                   |
|--------|------------------|--------------------------------------------------------------------------------------|
| 1      | Cryptotanshinone | 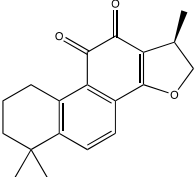 |
| 2      | Danshensu        |  |

3 Danshensu sodium salt

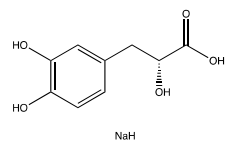

4 Tanshinone I

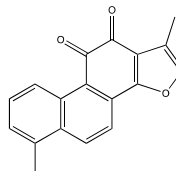

5 Tanshinone IIA

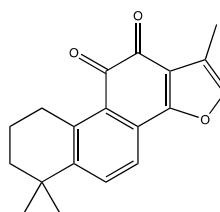

6 Tanshinone IIA sulfonate  
sodium

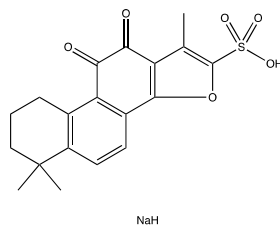

7 Lithospermic acid

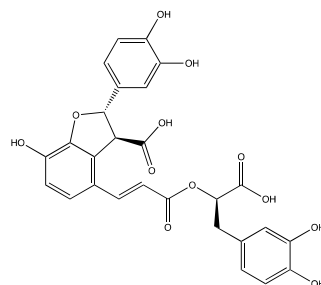

8 Salvianolic acid B

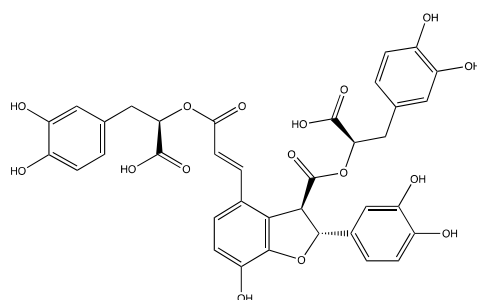

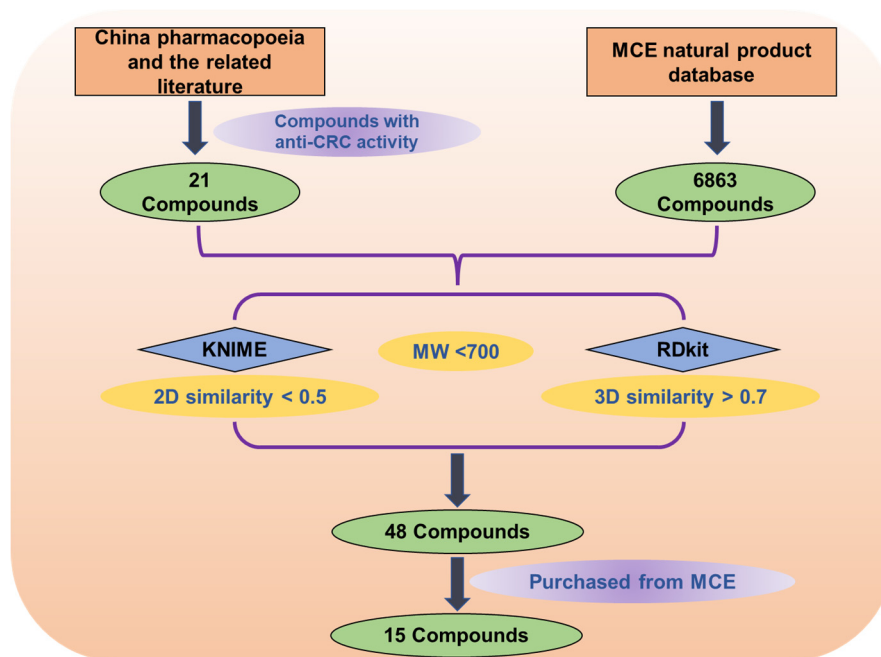

**Figure S2** Flow chart of virtual screening. First, 21 natural compounds with anti-CRC activity were selected from the Chinese Pharmacopoeia and related literature. Then, 21 compounds were used as query structures to screen the MCE natural product database (6863 compounds) by 2D and 3D similarity. KNIME was used to compute the 2D similarity between 2D structures. 3D conformations of each compound were generated with ETKDG algorithm in RDkit, then Open3DALIGN algorithm in RDKit was used to compute the 3D similarity between two 3D structures based on the overlap of their pharmacophores and heavy atoms. 48 compounds with 2D similarity less than 0.5 and 3D similarity greater than 0.7 and molecular weight less than 700 were selected. Finally, 15 compounds were purchased from MCE to determine their inhibitory effects on the proliferation of HCT116 cells.

**Table S3** Twenty-one known natural compounds with anti-CRC effects.

| Number | Name | Compound structure |
|--------|------|--------------------|
|--------|------|--------------------|

---

1 Frangula emodin

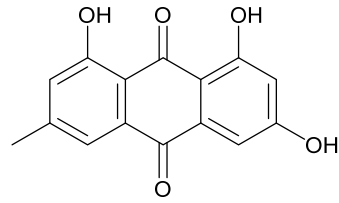

2 Rhabarberone

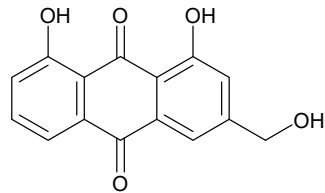

3 Esculentoside A

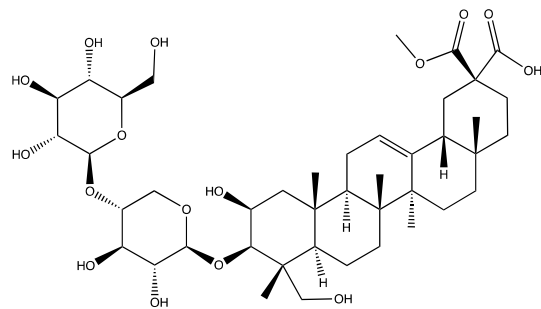

4 Tripterin (Celastrol)

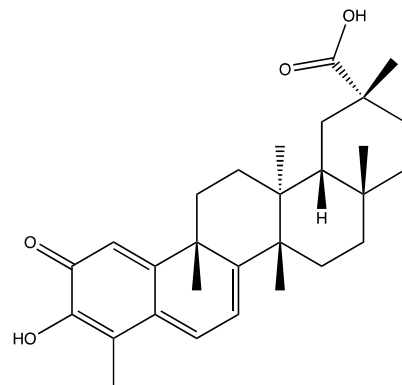

5 Honokiol

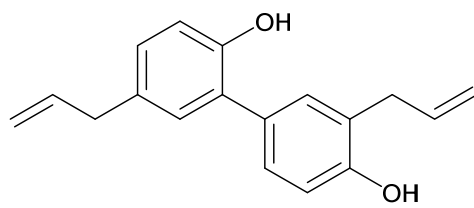

6 Resveratrol

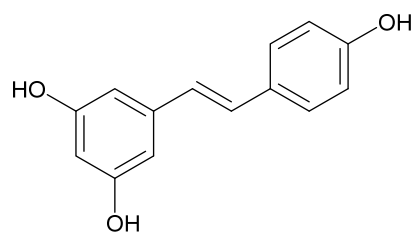

7 Evodiamine

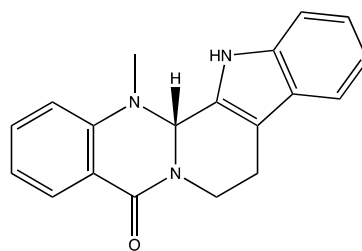

## 8 Octahydrocurcumin

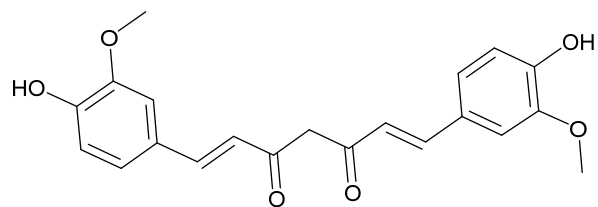

9 Tanshinone IIA

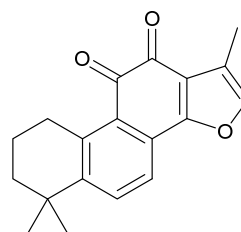

10 Cryptotanshinone

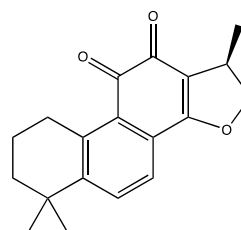

11           Arctiin

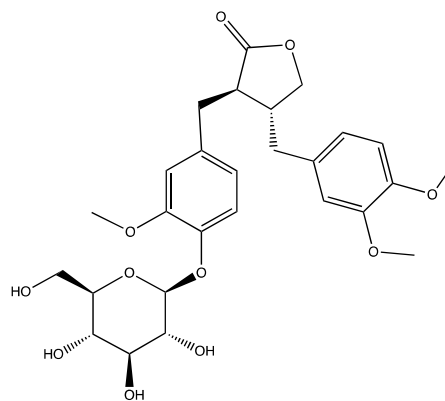

12 Berberine

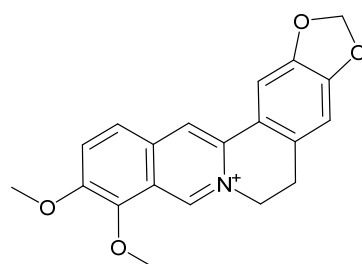



13 Andrographolide

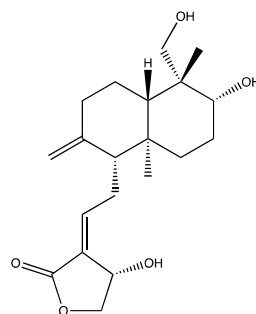

14 Polyphyllin I

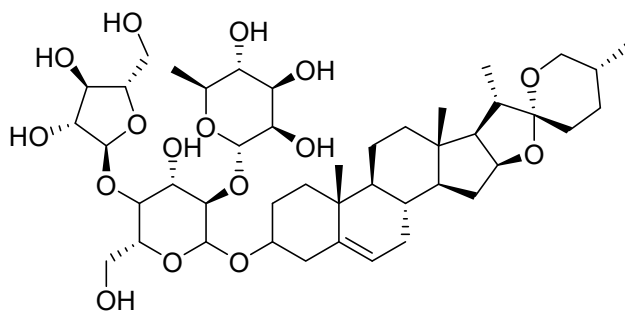

15 cantharidin

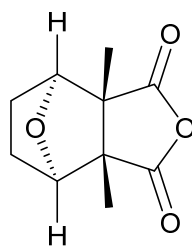

16 Norcantharidin

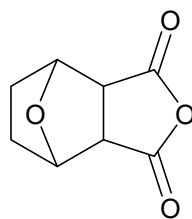

17 Sodium  
Cantharidinate For  
Injection

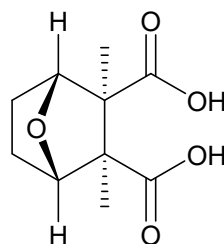

18 GypenosideA

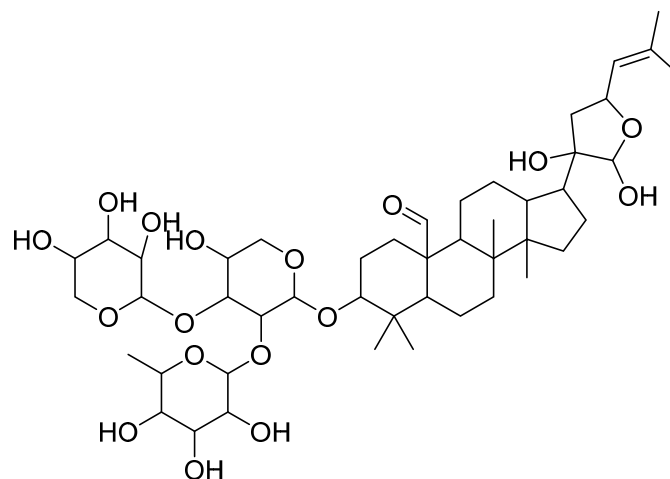

19 GypenosideXLIX

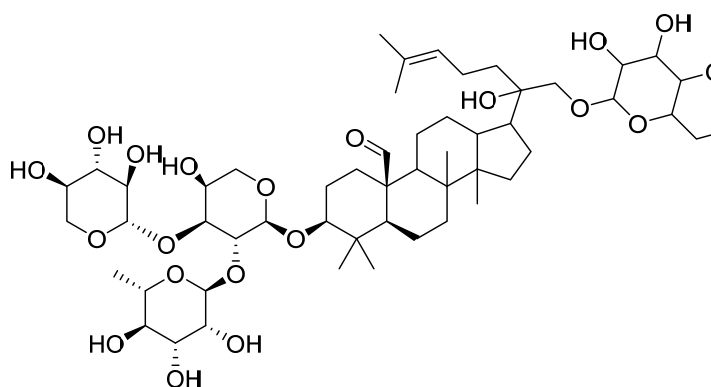

20 GypenosideXLVI

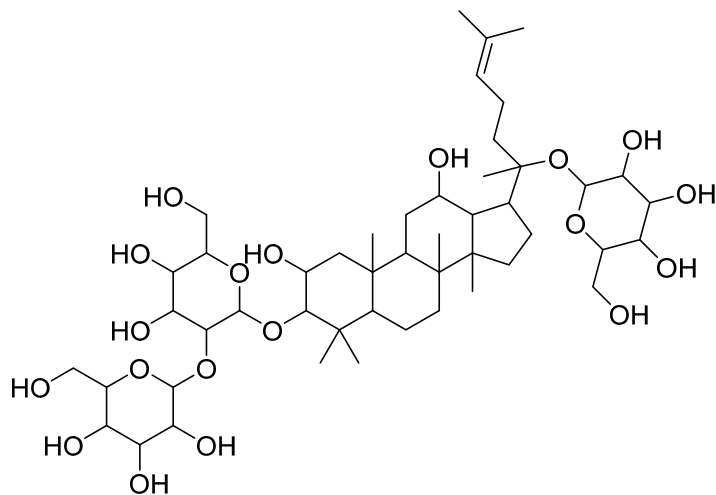

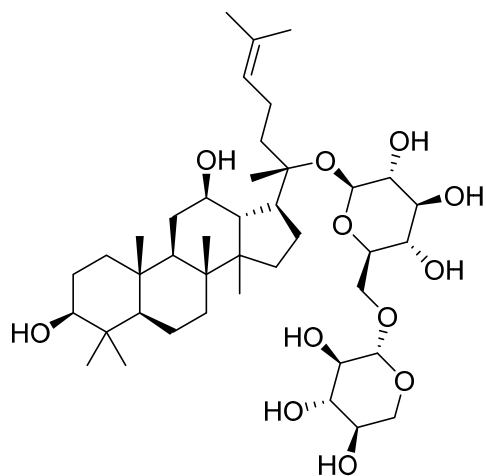

Supplement: s1 [file s1]
